# Supplementary material for: Development and preliminary evidence of the psychometric properties of the GNE myopathy functional activity scale
Source: Atypon-hosted journal article supplement (doi:10.2217/cer-2017-0062), 2017-11-15
Supplement: suppl_table_a.docx [file suppl_table_a.docx]

Supplementary Table A. Inter-item correlations at baseline (N=46)

|  | Mobility | | | | | | | | | |
| --- | --- | --- | --- | --- | --- | --- | --- | --- | --- | --- |
| **Item** | **1** | **2** | **3** | **4** | **5** | **6** | **7** | **8** | **9** | **10** |
| 1 | ***1.00*** | ***0.66*** | ***0.71*** | ***0.42*** | ***0.63*** | ***0.56*** | ***0.52*** | ***0.60*** | ***0.42*** | ***0.43*** |
| 2 | ***0.67*** | ***1.00*** | ***0.49*** | *0.26* | ***0.42*** | ***0.48*** | *0.35* | ***0.52*** | *0.18* | *0.20* |
| 3 | ***0.71*** | ***0.49*** | ***1.00*** | ***0.58*** | ***0.65*** | ***0.67*** | ***0.75*** | ***0.57*** | ***0.41*** | ***0.49*** |
| 4 | ***0.42*** | *0.26* | ***0.58*** | ***1.00*** | ***0.75*** | ***0.54*** | ***0.78*** | ***0.54*** | ***0.43*** | ***0.48*** |
| 5 | ***0.63*** | ***0.42*** | ***0.65*** | ***0.75*** | ***1.00*** | ***0.76*** | ***0.83*** | ***0.72*** | ***0.51*** | ***0.57*** |
| 6 | ***0.56*** | ***0.48*** | ***0.67*** | ***0.54*** | ***0.76*** | ***1.00*** | ***0.65*** | ***0.66*** | ***0.54*** | ***0.58*** |
| 7 | ***0.52*** | *0.37* | ***0.75*** | ***0.78*** | ***0.83*** | ***0.65*** | ***1.00*** | ***0.70*** | ***0.43*** | ***0.53*** |
| 8 | ***0.60*** | ***0.52*** | ***0.57*** | ***0.54*** | ***0.72*** | ***0.66*** | ***0.70*** | ***1.00*** | *0.35* | ***0.48*** |
| 9 | ***0.42*** | *0.18* | ***0.41*** | ***0.43*** | ***0.51*** | ***0.54*** | ***0.43*** | *0.35* | ***1.00*** | ***0.77*** |
| 10 | ***0.43*** | *0.21* | ***0.49*** | ***0.48*** | ***0.57*** | ***0.58*** | ***0.53*** | ***0.48*** | ***0.77*** | ***1.00*** |
| 11 | 0.36 | 0.39 | 0.36 | 0.22 | **0.45** | **0.43** | 0.32 | 0.27 | 0.14 | 0.08 |
| 12 | 0.10 | 0.03 | 0.26 | 0.27 | 0.18 | 0.35 | 0.22 | 0.27 | 0.03 | -0.09 |
| 13 | 0.32 | 0.31 | 0.26 | 0.17 | 0.38 | **0.61** | 0.24 | 0.36 | 0.15 | 0.09 |
| 14 | 0.27 | 0.27 | 0.21 | 0.12 | 0.25 | **0.41** | 0.17 | 0.36 | 0.01 | 0.00 |
| 15 | **0.49** | **0.41** | **0.50** | **0.60** | **0.65** | **0.60** | **0.68** | **0.57** | 0.24 | 0.30 |
| 16 | 0.31 | 0.23 | **0.47** | **0.41** | **0.57** | **0.44** | **0.65** | **0.51** | 0.14 | 0.20 |
| 17 | 0.40 | 0.37 | **0.43** | **0.41** | **0.48** | **0.48** | **0.47** | **0.41** | 0.15 | 0.17 |
| 18 | **0.60** | **0.52** | **0.54** | **0.51** | **0.65** | **0.62** | **0.60** | **0.69** | 0.32 | 0.38 |
| 19 | 0.38 | 0.31 | 0.36 | 0.28 | **0.44** | **0.56** | **0.47** | **0.45** | 0.15 | 0.05 |
| 20 | **0.50** | **0.46** | **0.42** | 0.34 | **0.55** | **0.56** | **0.60** | **0.65** | 0.17 | 0.18 |
| 21 | **0.57** | **0.57** | **0.48** | 0.32 | **0.55** | **0.60** | **0.50** | **0.59** | 0.22 | 0.25 |
| 22 | **0.58** | **0.40** | **0.55** | 0.25 | **0.47** | **0.54** | **0.37** | **0.59** | 0.35 | **0.44** |
| 23 | 0.35 | 0.21 | 0.27 | 0.13 | 0.38 | **0.48** | 0.24 | 0.39 | 0.09 | 0.01 |
| 24 | **0.59** | **0.55** | **0.67** | **0.44** | **0.59** | **0.58** | **0.66** | **0.56** | 0.37 | **0.47** |
| 25 | **0.52** | **0.53** | **0.59** | 0.35 | **0.49** | **0.55** | **0.58** | **0.56** | 0.24 | 0.27 |

**Table 7. (continued) Inter-item correlations at baseline (N=46)**

|  | Upper Extremity | | | | | | | | Self-Care | | | | | | |
| --- | --- | --- | --- | --- | --- | --- | --- | --- | --- | --- | --- | --- | --- | --- | --- |
| **Item** | **11** | **12** | **13** | **14** | **15** | **16** | **17** | **18** | **19** | **20** | **21** | **22** | **23** | **24** | **25** |
| 1 | 0.36 | 0.10 | 0.32 | 0.27 | **0.49** | 0.31 | 0.40 | **0.60** | 0.38 | **0.50** | **0.57** | **0.58** | 0.35 | **0.59** | **0.52** |
| 2 | 0.39 | 0.03 | 0.31 | 0.27 | **0.41** | 0.23 | 0.37 | **0.52** | 0.31 | **0.46** | **0.57** | **0.40** | 0.21 | **0.55** | **0.53** |
| 3 | 0.36 | 0.26 | 0.26 | 0.21 | **0.5** | **0.47** | **0.43** | **0.54** | 0.36 | **0.42** | **0.48** | **0.56** | 0.27 | **0.67** | **0.59** |
| 4 | 0.22 | 0.27 | 0.17 | 0.12 | **0.60** | **0.41** | **0.41** | **0.51** | 0.28 | 0.34 | 0.32 | 0.25 | 0.13 | **0.44** | 0.35 |
| 5 | **0.45** | 0.18 | 0.38 | 0.25 | **0.65** | **0.57** | **0.48** | **0.65** | **0.44** | **0.55** | **0.55** | **0.47** | 0.38 | **0.59** | **0.49** |
| 6 | **0.43** | 0.35 | **0.61** | **0.41** | **0.60** | **0.44** | **0.48** | **0.62** | **0.56** | **0.56** | **0.60** | **0.54** | **0.48** | **0.58** | **0.55** |
| 7 | 0.32 | 0.22 | 0.24 | 0.17 | **0.68** | **0.65** | **0.47** | **0.60** | **0.47** | **0.60** | **0.50** | 0.36 | 0.24 | **0.67** | **0.58** |
| 8 | 0.27 | 0.27 | 0.36 | 0.36 | **0.57** | **0.51** | **0.41** | **0.69** | **0.45** | **0.65** | **0.59** | **0.52** | 0.39 | **0.56** | **0.56** |
| 9 | 0.14 | 0.03 | 0.15 | 0.01 | 0.24 | 0.14 | 0.15 | 0.32 | 0.15 | 0.17 | 0.22 | 0.35 | 0.09 | 0.37 | 0.24 |
| 10 | 0.07 | -0.09 | 0.09 | 0.00 | 0.30 | 0.20 | 0.18 | 0.38 | 0.05 | 0.18 | 0.25 | **0.44** | 0.01 | **0.47** | 0.27 |
| 11 | ***1.00*** | *0.31* | ***0.66*** | ***0.50*** | *0.35* | ***0.52*** | ***0.63*** | ***0.42*** | **0.50** | **0.46** | **0.56** | 0.28 | **0.63** | **0.44** | **0.46** |
| 12 | *0.31* | ***1.00*** | ***0.43*** | ***0.58*** | *0.36* | *0.28* | ***0.49*** | *0.37* | **0.48** | 0.31 | 0.30 | 0.01 | **0.48** | 0.20 | 0.34 |
| 13 | ***0.66*** | ***0.43*** | ***1.00*** | ***0.69*** | ***0.43*** | ***0.47*** | ***0.56*** | ***0.43*** | **0.59** | **0.52** | **0.59** | 0.36 | **0.76** | 0.36 | **0.44** |
| 14 | ***0.50*** | ***0.58*** | ***0.69*** | ***1.00*** | ***0.46*** | ***0.56*** | ***0.65*** | ***0.48*** | **0.50** | **0.48** | **0.48** | 0.19 | **0.65** | 0.39 | **0.48** |
| 15 | *0.35* | *0.36* | ***0.43*** | ***0.46*** | ***1.00*** | ***0.60*** | ***0.73*** | ***0.70*** | **0.66** | **0.73** | **0.55** | 0.26 | **0.51** | **0.48** | **0.56** |
| 16 | ***0.52*** | *0.28* | ***0.47*** | ***0.56*** | ***0.60*** | ***1.00*** | ***0.63*** | ***0.49*** | **0.55** | **0.61** | **0.50** | 0.39 | **0.49** | **0.60** | **0.62** |
| 17 | ***0.63*** | ***0.47*** | ***0.60*** | ***0.65*** | ***0.73*** | ***0.63*** | ***1.00*** | ***0.72*** | **0.61** | **0.58** | **0.64** | 0.23 | **0.72** | **0.45** | **0.48** |
| 18 | ***0.42*** | *0.37* | ***0.43*** | ***0.48*** | ***0.70*** | ***0.49*** | ***0.72*** | ***1.00*** | **0.58** | **0.66** | **0.64** | **0.43** | **0.51** | **0.58** | **0.46** |
| 19 | **0.50** | **0.48** | **0.56** | **0.50** | **0.67** | **0.55** | **0.61** | **0.58** | ***1.00*** | ***0.85*** | ***0.63*** | *0.36* | ***0.72*** | ***0.46*** | ***0.46*** |
| 20 | **0.46** | 0.31 | **0.52** | **0.48** | **0.73** | **0.61** | **0.58** | **0.66** | ***0.85*** | ***1.00*** | ***0.71*** | ***0.37*** | ***0.59*** | ***0.57*** | ***0.61*** |
| 21 | **0.56** | 0.30 | **0.59** | **0.48** | **0.55** | **0.50** | **0.64** | **0.66** | ***0.63*** | ***0.71*** | ***1.00*** | ***0.43*** | ***0.65*** | ***0.57*** | ***0.56*** |
| 22 | 0.28 | 0.01 | 0.36 | 0.19 | 0.26 | 0.39 | 0.23 | 0.43 | *0.36* | ***0.37*** | ***0.43*** | ***1.00*** | *0.37* | ***0.61*** | *0.38* |
| 23 | **0.63** | **0.48** | **0.76** | **0.65** | **0.51** | **0.49** | **0.72** | **0.51** | ***0.72*** | ***0.60*** | ***0.65*** | *0.37* | ***1.00*** | *0.33* | ***0.43*** |
| 24 | **0.44** | 0.20 | 0.36 | 0.39 | **0.48** | **0.60** | **0.45** | **0.58** | ***0.46*** | ***0.57*** | ***0.57*** | ***0.61*** | *0.33* | ***1.00*** | ***0.69*** |
| 25 | **0.46** | 0.34 | **0.44** | **0.48** | **0.58** | **0.62** | **0.484** | **0.46** | ***0.46*** | ***0.61*** | ***0.56*** | *0.38* | ***0.43*** | ***0.67*** | ***1.00*** |

| Low correlations (<0.4) | Moderate correlations (0.40 to 0.70) | High correlations (>0.7) | *Intra-domain item correlations (italics)* |
| --- | --- | --- | --- |
