# Supplementary material for: Development and preliminary evidence of the psychometric properties of the GNE myopathy functional activity scale
Source: Atypon-hosted journal article supplement (doi:10.2217/cer-2017-0062), 2017-11-15
Supplement: suppl_table_b.docx [file suppl_table_b.docx]

| **Supplementary Table B. Test-retest reliability of GNEM-FAS: baseline and week 12 in stable subjects defined by those experiencing minimal change (<0.2SD on 6MWT, ≤2.9 points on the IBM-FRS and <0.2SD on HHD).** | | | | | | |
| --- | --- | --- | --- | --- | --- | --- |
| Score | N | Reliability (ICC) * | 95% Confidence Interval | | Change Score  Mean (SD) | p-value† | |
| Lower | Upper |
| **Mobility Score** | | | | | | | |
| 6MWT definition of a stable population (<0.2SD) | 46 | 0.94 | 0.89 | 0.96 | -0.1 (2.5) | 0.817 | |
| IBM-FRS definition of a stable population (≤2.9 score change) | 37 | 0.95 | 0.90 | 0.98 | 0.1 (2.4) | 0.836 | |
| HHD total composite score definition of a stable population (<0.2SD) | 43 | 0.93 | 0.88 | 0.96 | -0.2 (2.5) | 0.677 | |
| **Upper Extremity Score** | | | | | | | |
| 6MWT definition of a stable population (<0.2SD) | 46 | 0.92 | 0.85 | 0.95 | -0.3 (2.5) | 0.358 | |
| IBM-FRS definition of a stable population (≤2.9 score change) | 37 | 0.93 | 0.86 | 0.96 | 0.1 (2.3) | 0.888 | |
| HHD total composite score definition of a stable population (<0.2SD) | 43 | 0.913 | 0.85 | 0.95 | -0.4 (2.6) | 0.352 | |
| **Self-Care score** | | | | | | | |
| 6MWT definition of a stable population (<0.2SD) | 46 | 0.88 | 0.79 | 0.93 | -0.7 (2.3) | 0.063 | |
| IBM-FRS definition of a stable population (≤2.9 score change) | 37 | 0.89 | 0.79 | 0.94 | -0.6 (2.0) | 0.073 | |
| HHD total composite score definition of a stable population (<0.2SD) | 43 | 0.87 | 0.78 | 0.93 | -0.7 (2.4) | 0.072 | |
| **Functional Activity Total Score** | | | | | | | |
| 6MWT definition of a stable population (<0.2SD) | 46 | 0.94 | 0.88 | 0.97 | -1.1 (5.5) | 0.189 | |
| IBM-FRS definition of a stable population (≤2.9 score change) | 37 | 0.96 | 0.93 | 0.98 | -0.5 (4.4) | 0.505 | |
| HHD total composite score definition of a stable population (<0.2SD) | 43 | 0.94 | 0.89 | 0.97 | -1.2 (5.6) | 0.165 | |

* ICC computed using Shrout-Fleiss reliability: single score statistic using data from baseline and week 12.

† p-values are derived from a paired t-test testing the difference in mean scores between baseline and week 12.

6MWT, 6 minute walk test; GNEM-FAS, GNE myopathy functional activities scale; HHD, Hand held dynamometry; IBM-FRS, Inclusion body myositis-functional rating scale; ICC, Intra-Class Correlation Coefficient; SD, Standard deviation.
